# Supplementary material for: New method of measuring subjective well-being: prospective validation study of the ‘Daily Experience Sampling Questionnaire’ (DESQ) in patients with psoriasis and healthy subjects in Germany
Source: HighWire-hosted journal article supplement (doi:10.1136/bmjopen-2020-039227), 2020-12-01
Supplement: bmjopen-2020-039227supp002_data_supplement.pdf [file bmjopen-2020-039227supp002_data_supplement.pdf]

**Online supplementary appendix figure 1:** Question on subjective well-being within the experience sampling app (original German wording)
