# Supplementary figures and images for: New method of measuring subjective well-being: prospective validation study of the ‘Daily Experience Sampling Questionnaire’ (DESQ) in patients with psoriasis and healthy subjects in Germany
Source: HighWire-hosted journal article supplement (doi:10.1136/bmjopen-2020-039227), 2020-12-01

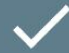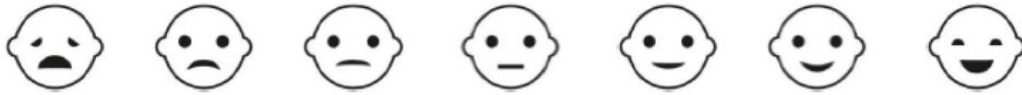

## Wie fühlen Sie sich?

- sehr schlecht
- schlecht
- eher schlecht
- mittelmäßig
- eher gut
- gut
- sehr gut

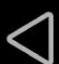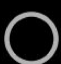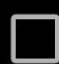

Supplement: bmjopen-2020-039227supp001_data_supplement.pdf [file bmjopen-2020-039227supp001_data_supplement.pdf]
